# Supplementary material
Source: publisher site journal article supplement (https://www.dovepress.com/article/265537)
Supplement: Supplementary file 1 [file get_supplementary_file.php]

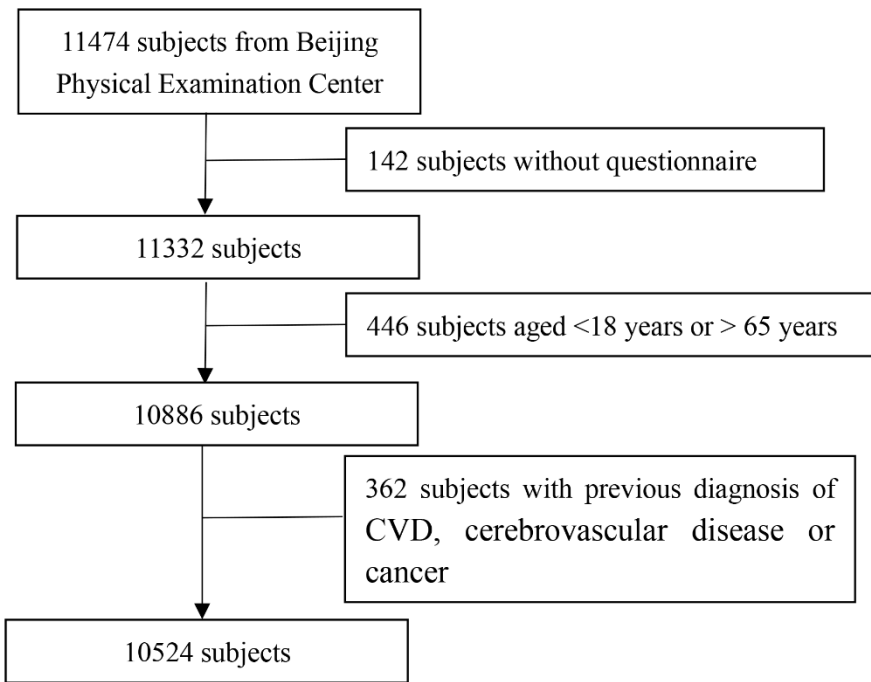

Figure S1. Flowchart showing the study subject selection procedure

Table S1. Spearman correlations between the different air pollutants

| Air pollutants    | CO     | NO <sub>2</sub> | O <sub>3</sub> | PM <sub>10</sub> | PM <sub>2.5</sub> | SO <sub>2</sub> |
|-------------------|--------|-----------------|----------------|------------------|-------------------|-----------------|
| CO                | 1.00   |                 |                |                  |                   |                 |
| NO <sub>2</sub>   | 0.48*  | 1.00            |                |                  |                   |                 |
| O <sub>3</sub>    | -0.65* | -0.78*          | 1.00           |                  |                   |                 |
| PM <sub>10</sub>  | 0.41*  | 0.10*           | -0.06*         | 1.00             |                   |                 |
| PM <sub>2.5</sub> | 0.42*  | 0.45*           | -0.55*         | 0.31*            | 1.00              |                 |
| SO <sub>2</sub>   | 0.58*  | 0.29*           | -0.24*         | 0.44*            | 0.09*             | 1.00            |

Table S2. Annual mean concentrations of the pollution factors categories by commuting mode in urban areas of Beijing during the study period

| Variables                                   | Car or Taxi   | Walking       | Cycling       | Bus           | Subway        |
|---------------------------------------------|---------------|---------------|---------------|---------------|---------------|
| mean PM <sub>10</sub> (µg/m <sup>3</sup> )  | 102.46 ± 4.68 | 102.44 ± 4.73 | 102.62 ± 3.43 | 102.66 ± 3.93 | 102.74 ± 4.12 |
| mean PM <sub>2.5</sub> (µg/m <sup>3</sup> ) | 77.50 ± 3.08  | 77.13 ± 3.29  | 77.74 ± 2.40  | 77.53 ± 2.61  | 77.39 ± 2.67  |
| mean SO <sub>2</sub> (µg/m <sup>3</sup> )   | 11.87 ± 1.31  | 11.95 ± 1.30  | 11.82 ± 1.11  | 11.91 ± 1.20  | 11.88 ± 1.14  |
| mean CO (mg/m <sup>3</sup> )                | 1.23 ± 0.06   | 1.23 ± 0.06   | 1.23 ± 0.05   | 1.24 ± 0.05   | 1.23 ± 0.05   |
| mean NO <sub>2</sub> (µg/m <sup>3</sup> )   | 59.42 ± 6.91  | 58.86 ± 7.08  | 59.62 ± 5.86  | 59.27 ± 6.02  | 58.76 ± 6.50  |
| mean O <sub>3</sub> (µg/m <sup>3</sup> )    | 36.86 ± 4.16  | 37.09 ± 4.00  | 36.66 ± 3.29  | 36.85 ± 3.63  | 37.19 ± 4.29  |

Data were shown in mean ± standard deviation.

CO, carbon monoxide; NO<sub>2</sub>, nitrogen dioxide; O<sub>3</sub>, ozone; PM<sub>10</sub>, particulate matter ≤ 10 µm in aerodynamic diameter; PM<sub>2.5</sub>, particulate matter ≤ 2.5 µm in aerodynamic diameter; SO<sub>2</sub>: sulphur dioxide.

Table S3. Results of logistic regression models for the association between commuting mode and air pollutants on **overall obesity**<sup>Δ</sup>

| Model       | PM <sub>2.5</sub> <sup>a</sup> |                                 | SO <sub>2</sub> <sup>b</sup> |                                 | CO <sup>c</sup> |                                 | NO <sub>2</sub> <sup>d</sup> |                                 | O <sub>3</sub> <sup>e</sup> |                                 |
|-------------|--------------------------------|---------------------------------|------------------------------|---------------------------------|-----------------|---------------------------------|------------------------------|---------------------------------|-----------------------------|---------------------------------|
|             | OR (95% CI)                    | <i>P</i> <sub>interaction</sub> | OR (95% CI)                  | <i>P</i> <sub>interaction</sub> | OR (95% CI)     | <i>P</i> <sub>interaction</sub> | OR (95% CI)                  | <i>P</i> <sub>interaction</sub> | OR (95% CI)                 | <i>P</i> <sub>interaction</sub> |
| Total       |                                |                                 |                              |                                 |                 |                                 |                              |                                 |                             |                                 |
| Car or Taxi | Reference                      | -                               | Reference                    | -                               | Reference       | -                               | Reference                    | -                               | Reference                   | -                               |
| Walking     | 0.80(0.48,1.34)                | 0.9347                          | 1.40(0.81,2.42)              | <b>0.0247</b>                   | 1.00(0.61,1.63) | 0.2717                          | 1.14(0.61,2.14)              | 0.4674                          | <b>0.60(0.36,0.98)</b>      | 0.2533                          |
| Cycling     | 0.64(0.36,1.15)                | 0.2874                          | 0.87(0.48,1.61)              | 0.9542                          | 0.68(0.38,1.21) | 0.3816                          | 1.03(0.53,2.02)              | 0.5306                          | 1.00(0.62,1.59)             | 0.5170                          |
| Bus         | 1.26(0.82,1.92)                | 0.0513                          | 1.16(0.74,1.83)              | 0.1587                          | 1.12(0.72,1.75) | 0.1940                          | 1.07(0.63,1.80)              | 0.7543                          | 0.67(0.44,1.01)             | 0.2084                          |
| Subway      | 0.93(0.61,1.43)                | 0.5867                          | 0.74(0.46,1.20)              | 0.5892                          | 1.01(0.65,1.55) | 0.3622                          | 1.13(0.66,1.93)              | 0.3146                          | 0.73(0.48,1.12)             | 0.5231                          |
| Men         |                                |                                 |                              |                                 |                 |                                 |                              |                                 |                             |                                 |
| Car or Taxi | Reference                      | -                               | Reference                    | -                               | Reference       | -                               | Reference                    | -                               | Reference                   | -                               |

|             |                        |        |                         |               |                 |        |                  |        |                        |        |
|-------------|------------------------|--------|-------------------------|---------------|-----------------|--------|------------------|--------|------------------------|--------|
| Walking     | 0.70(0.38,1.28)        | 0.8962 | 1.32(0.71,2.46)         | <b>0.0399</b> | 0.98(0.56,1.72) | 0.2305 | 1.06(0.53,2.14)  | 0.5477 | <b>0.45(0.25,0.80)</b> | 0.0738 |
| Cycling     | <b>0.50(0.26,0.97)</b> | 0.1351 | 0.64(0.32,1.27)         | 0.5066        | 0.57(0.30,1.07) | 0.2484 | 0.93(0.45,1.93)  | 0.5151 | 1.00(0.60,1.67)        | 0.3558 |
| Bus         | 1.21(0.74,1.97)        | 0.0811 | 0.99(0.59,1.65)         | 0.4115        | 1.07(0.65,1.76) | 0.2382 | 1.09(0.62,1.93)  | 0.4648 | <b>0.58(0.36,0.93)</b> | 0.1386 |
| Subway      | 0.81(0.49,1.34)        | 0.8851 | <b>0.52(0.30,0.91)</b>  | 0.1151        | 0.86(0.52,1.41) | 0.7027 | 0.72(0.39,1.33)  | 0.8618 | 0.85(0.52,1.37)        | 0.7467 |
| Women       |                        |        |                         |               |                 |        |                  |        |                        |        |
| Car or Taxi | Reference              | -      | Reference               | -             | Reference       | -      | Reference        | -      | Reference              | -      |
| Walking     | 1.01(0.36,2.84)        | 0.9652 | 2.80(0.76,10.26)        | 0.0916        | 1.79(0.57,5.59) | 0.2730 | 1.17(0.25,5.44)  | 0.9790 | 1.15(0.40,3.32)        | 0.7476 |
| Cycling     | 1.47(0.43,5.04)        | 0.7902 | 3.87(0.92,16.21)        | 0.1072        | 1.98(0.51,7.73) | 0.5113 | 0.82(0.13,5.13)  | 0.4559 | 0.96(0.31,2.95)        | 0.5941 |
| Bus         | 1.40(0.57,3.43)        | 0.6334 | <b>3.48(1.12,10.85)</b> | <b>0.0408</b> | 2.22(0.76,6.52) | 0.1964 | 0.94(0.24,3.64)  | 0.3782 | 1.00(0.41,2.45)        | 0.7436 |
| Subway      | 1.37(0.56,3.31)        | 0.5351 | <b>3.17(1.03,9.75)</b>  | <b>0.0418</b> | 2.33(0.84,6.43) | 0.1017 | 3.01(0.84,10.83) | 0.2418 | 0.45(0.17,1.18)        | 0.0630 |

Abbreviations: CI, confidence interval; OR, odds ratio; PM<sub>2.5</sub>, particulate matter ≤ 2.5 μm in aerodynamic diameter; SO<sub>2</sub>: sulphur dioxide; CO, carbon monoxide; NO<sub>2</sub>, nitrogen dioxide; O<sub>3</sub>, ozone.

<sup>Δ</sup> Data were shown in OR (95% CI). OR were scaled to the interquartile range (IQR) for each air pollutant. Bold indicates significant values.

<sup>a</sup> adjusted for age, gender, education, commuting time per day, self-reported work stress, physical activity frequency and intensity, sleep duration, smoking status, alcohol consumption status, proportion of meat and vegetable intake, dietary preferences and medical history of hypertension and diabetes, PM<sub>2.5</sub>.

<sup>b</sup> adjusted for age, gender, education, commuting time per day, self-reported work stress, physical activity frequency and intensity, sleep duration, smoking status, alcohol consumption status, proportion of meat and vegetable intake, dietary preferences and medical history of hypertension and diabetes, SO<sub>2</sub>.

<sup>c</sup> adjusted for age, gender, education, commuting time per day, self-reported work stress, physical activity frequency and intensity, sleep duration, smoking status, alcohol consumption status, proportion of meat and vegetable intake, dietary preferences and medical history of hypertension and diabetes, CO.

<sup>d</sup> adjusted for age, gender, education, commuting time per day, self-reported work stress, physical activity frequency and intensity, sleep duration, smoking status, alcohol consumption status, proportion of meat and vegetable intake, dietary preferences and medical history of hypertension and diabetes, NO<sub>2</sub>.

<sup>e</sup> adjusted for age, gender, education, commuting time per day, self-reported work stress, physical activity frequency and intensity, sleep duration, smoking status, alcohol consumption status, proportion of meat and vegetable intake, dietary preferences and medical history of hypertension and diabetes, O<sub>3</sub>.

Table S4. Results of logistic regression models for the association between commuting mode and air pollutants on **abdominal obesity**. <sup>Δ</sup>

| Model       | PM <sub>2.5</sub> <sup>a</sup> |                                 | SO <sub>2</sub> <sup>b</sup> |                                 | CO <sup>c</sup> |                                 | NO <sub>2</sub> <sup>d</sup> |                                 | O <sub>3</sub> <sup>e</sup> |                                 |
|-------------|--------------------------------|---------------------------------|------------------------------|---------------------------------|-----------------|---------------------------------|------------------------------|---------------------------------|-----------------------------|---------------------------------|
|             | OR (95% CI)                    | <i>P</i> <sub>interaction</sub> | OR (95% CI)                  | <i>P</i> <sub>interaction</sub> | OR (95% CI)     | <i>P</i> <sub>interaction</sub> | OR (95% CI)                  | <i>P</i> <sub>interaction</sub> | OR (95% CI)                 | <i>P</i> <sub>interaction</sub> |
| Total       |                                |                                 |                              |                                 |                 |                                 |                              |                                 |                             |                                 |
| Car or Taxi | Reference                      | -                               | Reference                    | -                               | Reference       | -                               | Reference                    | -                               | Reference                   | -                               |
| Walking     | 1.10(0.76,1.61)                | 0.0848                          | 0.91(0.59,1.40)              | 0.5355                          | 0.95(0.65,1.39) | 0.3238                          | 1.15(0.70,1.87)              | 0.1712                          | <b>0.63(0.44,0.92)</b>      | 0.1970                          |
| Cycling     | 0.86(0.56,1.32)                | 0.9089                          | 0.92(0.57,1.47)              | 0.8700                          | 0.68(0.44,1.05) | 0.1962                          | 0.97(0.57,1.65)              | 0.7267                          | 1.17(0.79,1.72)             | 0.1100                          |
| Bus         | 0.89(0.64,1.23)                | 0.5388                          | 1.03(0.72,1.48)              | 0.1499                          | 0.92(0.65,1.31) | 0.3861                          | 0.89(0.59,1.35)              | 0.9828                          | 0.79(0.57,1.10)             | 0.9228                          |
| Subway      | 0.99(0.72,1.37)                | 0.4472                          | 0.93(0.65,1.33)              | 0.7737                          | 0.84(0.60,1.18) | 0.7630                          | 1.06(0.70,1.61)              | 0.5468                          | 1.00(0.72,1.38)             | 0.4629                          |
| Men         |                                |                                 |                              |                                 |                 |                                 |                              |                                 |                             |                                 |
| Car or Taxi | Reference                      | -                               | Reference                    | -                               | Reference       | -                               | Reference                    | -                               | Reference                   | -                               |
| Walking     | 0.94(0.58,1.52)                | 0.1851                          | 1.06(0.62,1.84)              | 0.0890                          | 0.85(0.53,1.37) | 0.3064                          | 1.10(0.61,2.00)              | 0.2730                          | <b>0.43(0.27,0.68)</b>      | <b>0.0331</b>                   |
| Cycling     | 0.80(0.48,1.34)                | 0.9544                          | 0.84(0.48,1.47)              | 0.9172                          | 0.67(0.40,1.13) | 0.4509                          | 1.15(0.63,2.12)              | 0.2675                          | 0.94(0.59,1.50)             | 0.4699                          |
| Bus         | 0.72(0.47,1.09)                | 0.7014                          | 0.90(0.58,1.41)              | 0.4866                          | 0.82(0.53,1.27) | 0.7588                          | 0.97(0.59,1.60)              | 0.5671                          | 0.71(0.47,1.08)             | 0.6425                          |
| Subway      | 0.90(0.59,1.35)                | 0.6302                          | 0.77(0.49,1.22)              | 0.7996                          | 0.86(0.57,1.31) | 0.7914                          | 0.83(0.50,1.38)              | 0.8074                          | 0.84(0.55,1.29)             | 0.8938                          |
| Women       |                                |                                 |                              |                                 |                 |                                 |                              |                                 |                             |                                 |
| Car or Taxi | Reference                      | -                               | Reference                    | -                               | Reference       | -                               | Reference                    | -                               | Reference                   | -                               |
| Walking     | 1.27(0.69,2.31)                | 0.5478                          | 0.84(0.40,1.77)              | 0.5526                          | 1.39(0.74,2.64) | 0.3373                          | 1.06(0.44,2.51)              | 0.7372                          | 1.15(0.62,2.15)             | 0.7354                          |
| Cycling     | 1.01(0.46,2.21)                | 0.8434                          | 1.32(0.55,3.15)              | 0.6543                          | 0.82(0.35,1.91) | 0.4484                          | 0.49(0.16,1.49)              | 0.1237                          | 1.65(0.84,3.27)             | 0.1913                          |
| Bus         | 1.25(0.73,2.15)                | 0.1851                          | 1.58(0.83,2.97)              | 0.0590                          | 1.37(0.73,2.56) | 0.1475                          | 0.66(0.30,1.43)              | 0.2202                          | 0.94(0.54,1.62)             | 0.8333                          |
| Subway      | 1.16(0.68,1.98)                | 0.5726                          | 1.42(0.77,2.63)              | 0.2379                          | 0.91(0.51,1.65) | 0.7134                          | 1.33(0.64,2.76)              | 0.5499                          | 1.22(0.71,2.08)             | 0.4684                          |

Abbreviations: CI, confidence interval; OR, odds ratio; PM<sub>2.5</sub>, particulate matter ≤ 2.5 μm in aerodynamic diameter; SO<sub>2</sub>: sulphur dioxide; CO, carbon monoxide; NO<sub>2</sub>, nitrogen dioxide; O<sub>3</sub>, ozone.

<sup>Δ</sup> Data were shown in OR (95% CI). OR were scaled to the interquartile range (IQR) for each air pollutant. Bold indicates significant values.

<sup>a</sup> adjusted for age, gender, education, commuting time per day, self-reported work stress, physical activity frequency and intensity, sleep duration, smoking status, alcohol consumption status, proportion of meat and vegetable intake, dietary preferences and medical history of hypertension and diabetes, PM<sub>2.5</sub>.

<sup>b</sup> adjusted for age, gender, education, commuting time per day, self-reported work stress, physical activity frequency and intensity, sleep duration, smoking status, alcohol consumption status, proportion of meat and vegetable intake, dietary preferences and medical history of hypertension and diabetes, SO<sub>2</sub>.

<sup>c</sup> adjusted for age, gender, education, commuting time per day, self-reported work stress, physical activity frequency and intensity, sleep duration, smoking status,

alcohol consumption status, proportion of meat and vegetable intake, dietary preferences and medical history of hypertension and diabetes, CO.

<sup>d</sup> adjusted for age, gender, education, commuting time per day, self-reported work stress, physical activity frequency and intensity, sleep duration, smoking status, alcohol consumption status, proportion of meat and vegetable intake, dietary preferences and medical history of hypertension and diabetes, NO<sub>2</sub>.

<sup>e</sup> adjusted for age, gender, education, commuting time per day, self-reported work stress, physical activity frequency and intensity, sleep duration, smoking status, alcohol consumption status, proportion of meat and vegetable intake, dietary preferences and medical history of hypertension and diabetes, O<sub>3</sub>.

Table S5. Results of logistic regression models for the association between commuting mode and **overall obesity** in subgroups of physical activity frequency. <sup>Δ</sup>

| Main commuting mode                 | less than once<br>every week (n=3920) |                                 | more than once<br>every week (n=5176) |                                 | more than once<br>every day (n=1428) |                                 |
|-------------------------------------|---------------------------------------|---------------------------------|---------------------------------------|---------------------------------|--------------------------------------|---------------------------------|
|                                     | OR (95% CI)                           | <i>P</i> <sub>interaction</sub> | OR (95% CI)                           | <i>P</i> <sub>interaction</sub> | OR (95% CI)                          | <i>P</i> <sub>interaction</sub> |
| <b>PM<sub>10</sub><sup>a</sup></b>  |                                       |                                 |                                       |                                 |                                      |                                 |
| Car or Taxi                         | Reference                             | -                               | Reference                             | -                               | Reference                            | -                               |
| Walking                             | <b>0.26(0.09,0.75)</b>                | 0.1413                          | 0.81(0.41,1.60)                       | 0.8313                          | 1.98(0.67,5.92)                      | 0.1879                          |
| Cycling                             | <b>0.28(0.11,0.71)</b>                | <b>0.0268</b>                   | 0.73(0.33,1.63)                       | 0.6065                          | 0.50(0.14,1.79)                      | 0.1413                          |
| Bus                                 | <b>0.33(0.16,0.65)</b>                | <b>0.0203</b>                   | 1.07(0.59,1.94)                       | 0.9888                          | 1.52(0.46,5.00)                      | 0.1872                          |
| Subway                              | 0.61(0.32,1.18)                       | 0.5748                          | 0.72(0.39,1.34)                       | 0.3272                          | 1.00(0.27,3.70)                      | 0.7471                          |
| <b>PM<sub>2.5</sub><sup>b</sup></b> |                                       |                                 |                                       |                                 |                                      |                                 |
| Car or Taxi                         | Reference                             | -                               | Reference                             | -                               | Reference                            | -                               |
| Walking                             | 0.35(0.12,1.04)                       | 0.4316                          | 1.01(0.49,2.10)                       | 0.7241                          | 1.20(0.37,3.86)                      | 0.7240                          |
| Cycling                             | <b>0.27(0.1,0.76)</b>                 | <b>0.0399</b>                   | 1.11(0.47,2.60)                       | 0.5722                          | 0.77(0.20,2.92)                      | 0.4810                          |
| Bus                                 | 0.97(0.49,1.9)                        | 0.2760                          | <b>2.06(1.10,3.83)</b>                | <b>0.0233</b>                   | 0.44(0.12,1.57)                      | 0.3940                          |
| Subway                              | 0.62(0.32,1.22)                       | 0.6605                          | 1.57(0.83,2.94)                       | 0.0976                          | 0.38(0.09,1.57)                      | 0.2432                          |
| <b>SO<sub>2</sub><sup>c</sup></b>   |                                       |                                 |                                       |                                 |                                      |                                 |
| Car or Taxi                         | Reference                             | -                               | Reference                             | -                               | Reference                            | -                               |

|                              |                        |        |                 |        |                        |               |
|------------------------------|------------------------|--------|-----------------|--------|------------------------|---------------|
| Walking                      | 0.72(0.25,2.11)        | 0.4916 | 1.56(0.70,3.48) | 0.1166 | 3.13(0.87,11.26)       | 0.0653        |
| Cycling                      | 0.37(0.11,1.25)        | 0.2434 | 1.76(0.75,4.12) | 0.0898 | 0.92(0.21,4.05)        | 0.6986        |
| Bus                          | 0.67(0.30,1.47)        | 0.9127 | 1.83(0.96,3.49) | 0.0728 | 0.74(0.18,2.95)        | 0.9984        |
| Subway                       | 0.58(0.27,1.26)        | 0.5849 | 0.91(0.46,1.80) | 0.861  | 0.75(0.16,3.54)        | 0.8914        |
| CO <sup>d</sup>              |                        |        |                 |        |                        |               |
| Car or Taxi                  | Reference              | -      | Reference       | -      | Reference              | -             |
| Walking                      | 0.37(0.12,1.14)        | 0.5243 | 1.30(0.65,2.60) | 0.1218 | 1.64(0.52,5.18)        | 0.3552        |
| Cycling                      | 0.35(0.12,1.02)        | 0.1428 | 1.21(0.54,2.72) | 0.2045 | 0.59(0.15,2.31)        | 0.2575        |
| Bus                          | 0.73(0.33,1.58)        | 0.9145 | 1.68(0.91,3.10) | 0.3946 | 0.74(0.19,2.81)        | 0.9902        |
| Subway                       | 0.75(0.37,1.54)        | 0.8597 | 1.40(0.76,2.56) | 0.1065 | 0.54(0.13,2.28)        | 0.5230        |
| NO <sub>2</sub> <sup>e</sup> |                        |        |                 |        |                        |               |
| Car or Taxi                  | Reference              | -      | Reference       | -      | Reference              | -             |
| Walking                      | 1.26(0.40,4.02)        | 0.2799 | 1.41(0.55,3.62) | 0.5375 | 0.39(0.09,1.66)        | 0.2198        |
| Cycling                      | 0.66(0.20,2.25)        | 0.6882 | 1.46(0.55,3.89) | 0.5417 | 0.50(0.10,2.42)        | 0.3451        |
| Bus                          | 1.37(0.59,3.19)        | 0.2252 | 1.62(0.75,3.48) | 0.5236 | <b>0.11(0.02,0.57)</b> | <b>0.0194</b> |
| Subway                       | 0.96(0.40,2.28)        | 0.7689 | 1.86(0.85,4.07) | 0.1119 | 0.21(0.04,1.06)        | 0.1281        |
| O <sub>3</sub> <sup>f</sup>  |                        |        |                 |        |                        |               |
| Car or Taxi                  | Reference              | -      | Reference       | -      | Reference              | -             |
| Walking                      | <b>0.29(0.10,0.84)</b> | 0.2358 | 0.65(0.32,1.32) | 0.3991 | 1.21(0.37,3.88)        | 0.7340        |
| Cycling                      | 1.21(0.58,2.52)        | 0.1603 | 0.62(0.29,1.33) | 0.3284 | 2.49(0.78,7.90)        | 0.1813        |
| Bus                          | <b>0.45(0.23,0.86)</b> | 0.1453 | 0.66(0.36,1.21) | 0.0949 | 2.55(0.78,8.34)        | <b>0.0245</b> |
| Subway                       | 0.80(0.41,1.57)        | 0.7038 | 0.55(0.30,1.03) | 0.0576 | 1.32(0.33,5.31)        | 0.4110        |

Abbreviations: CI, confidence interval; OR, odds ratio; PM<sub>10</sub>, particulate matter ≤ 10 µm in aerodynamic diameter; PM<sub>2.5</sub>, particulate matter ≤ 2.5 µm in aerodynamic diameter; SO<sub>2</sub>: sulphur dioxide; CO, carbon monoxide; NO<sub>2</sub>, nitrogen dioxide; O<sub>3</sub>, ozone.

<sup>Δ</sup> Data were shown in OR (95% CI). OR were scaled to the interquartile range (IQR) for each air pollutant. Bold indicates significant values.

<sup>a</sup> adjusted for age, gender, education, commuting time per day, self-reported work stress, physical activity intensity, sleep duration, smoking status, alcohol consumption status, proportion of meat and vegetable intake, dietary preferences and medical history of hypertension and diabetes, PM<sub>10</sub>.

<sup>b</sup> adjusted for age, gender, education, commuting time per day, self-reported work stress, physical activity intensity, sleep duration, smoking status, alcohol consumption status, proportion of meat and vegetable intake, dietary preferences and medical history of hypertension and diabetes, PM<sub>2.5</sub>.

<sup>c</sup> adjusted for age, gender, education, commuting time per day, self-reported work stress, physical activity intensity, sleep duration, smoking status, alcohol consumption status, proportion of meat and vegetable intake, dietary preferences and medical history of hypertension and diabetes, SO<sub>2</sub>.

<sup>d</sup> adjusted for age, gender, education, commuting time per day, self-reported work stress, physical activity intensity, sleep duration, smoking status, alcohol consumption status, proportion of meat and vegetable intake, dietary preferences and medical history of hypertension and diabetes, CO.

<sup>e</sup> adjusted for age, gender, education, commuting time per day, self-reported work stress, physical activity intensity, sleep duration, smoking status, alcohol consumption status, proportion of meat and vegetable intake, dietary preferences and medical history of hypertension and diabetes, NO<sub>2</sub>.

<sup>f</sup> adjusted for age, gender, education, commuting time per day, self-reported work stress, physical activity intensity, sleep duration, smoking status, alcohol consumption status, proportion of meat and vegetable intake, dietary preferences and medical history of hypertension and diabetes, O<sub>3</sub>.

Table S6. Results of logistic regression models for the association between commuting mode and **abdominal obesity** in subgroups of physical activity frequency. <sup>Δ</sup>

| Main commuting mode            | less than once         |                                 | more than once      |                                 | more than once     |                                 |
|--------------------------------|------------------------|---------------------------------|---------------------|---------------------------------|--------------------|---------------------------------|
|                                | every week (n=3920)    |                                 | every week (n=5176) |                                 | every day (n=1428) |                                 |
|                                | OR (95% CI)            | <i>P</i> <sub>interaction</sub> | OR (95% CI)         | <i>P</i> <sub>interaction</sub> | OR (95% CI)        | <i>P</i> <sub>interaction</sub> |
| PM <sub>10</sub> <sup>a</sup>  |                        |                                 |                     |                                 |                    |                                 |
| Car or Taxi                    | Reference              | -                               | Reference           | -                               | Reference          | -                               |
| Walking                        | <b>0.28(0.13,0.61)</b> | 0.0733                          | 0.75(0.45,1.25)     | 0.3925                          | 0.99(0.43,2.27)    | 0.9586                          |
| Cycling                        | <b>0.24(0.11,0.52)</b> | <b>0.0012</b>                   | 0.88(0.48,1.58)     | 0.9727                          | 1.01(0.37,2.72)    | 0.7253                          |
| Bus                            | <b>0.44(0.25,0.76)</b> | 0.0783                          | 1.01(0.64,1.61)     | 0.7606                          | 1.15(0.48,2.76)    | 0.1917                          |
| Subway                         | <b>0.37(0.22,0.63)</b> | <b>0.0059</b>                   | 0.92(0.59,1.46)     | 0.7619                          | 0.73(0.28,1.89)    | 0.5052                          |
| PM <sub>2.5</sub> <sup>a</sup> |                        |                                 |                     |                                 |                    |                                 |
| Car or Taxi                    | Reference              | -                               | Reference           | -                               | Reference          | -                               |

|                              |                        |        |                 |               |                        |               |
|------------------------------|------------------------|--------|-----------------|---------------|------------------------|---------------|
| Walking                      | 0.49(0.22,1.07)        | 0.7731 | 1.52(0.91,2.53) | <b>0.0399</b> | 1.07(0.44,2.63)        | 0.8557        |
| Cycling                      | 0.88(0.41,1.9)         | 0.7392 | 0.82(0.45,1.51) | 0.8744        | 0.85(0.3,2.39)         | 0.4754        |
| Bus                          | 0.66(0.38,1.14)        | 0.8733 | 1.18(0.74,1.88) | 0.3089        | 0.68(0.27,1.67)        | 0.9825        |
| Subway                       | 0.84(0.5,1.42)         | 0.6051 | 1.02(0.65,1.61) | 0.8405        | 1.71(0.66,4.45)        | 0.2289        |
| SO <sub>2</sub> <sup>a</sup> |                        |        |                 |               |                        |               |
| Car or Taxi                  | Reference              | -      | Reference       | -             | Reference              | -             |
| Walking                      | <b>0.39(0.16,0.92)</b> | 0.4318 | 1.23(0.68,2.22) | 0.2917        | 1.13(0.4,3.18)         | 0.7706        |
| Cycling                      | 0.8(0.31,2.09)         | 0.9526 | 1.16(0.62,2.17) | 0.3374        | 0.78(0.24,2.5)         | 0.4437        |
| Bus                          | 0.68(0.35,1.32)        | 0.9855 | 1.35(0.83,2.2)  | 0.1285        | 0.84(0.31,2.3)         | 0.6573        |
| Subway                       | 0.57(0.3,1.08)         | 0.4178 | 1.09(0.67,1.77) | 0.6729        | 1.92(0.64,5.82)        | 0.2153        |
| CO <sup>a</sup>              |                        |        |                 |               |                        |               |
| Car or Taxi                  | Reference              | -      | Reference       | -             | Reference              | -             |
| Walking                      | 0.43(0.18,1.00)        | 0.5882 | 1.27(0.77,2.10) | 0.1584        | 1.01(0.42,2.45)        | 0.9699        |
| Cycling                      | <b>0.36(0.15,0.86)</b> | 0.0666 | 0.94(0.52,1.69) | 0.7585        | 0.73(0.26,2.03)        | 0.2764        |
| Bus                          | 0.62(0.32,1.18)        | 0.7532 | 1.17(0.74,1.87) | 0.3216        | 0.86(0.32,2.30)        | 0.6088        |
| Subway                       | 0.81(0.44,1.46)        | 0.7290 | 0.8(0.51,1.26)  | 0.3294        | 1.11(0.40,3.07)        | 0.8318        |
| NO <sub>2</sub> <sup>a</sup> |                        |        |                 |               |                        |               |
| Car or Taxi                  | Reference              | -      | Reference       | -             | Reference              | -             |
| Walking                      | 0.54(0.21,1.42)        | 0.8135 | 1.98(1.00,3.93) | 0.0656        | 0.63(0.19,2.05)        | 0.5087        |
| Cycling                      | 1.04(0.38,2.83)        | 0.494  | 0.88(0.42,1.84) | 0.9616        | 0.85(0.22,3.25)        | 0.5826        |
| Bus                          | 0.68(0.33,1.41)        | 0.8539 | 1.59(0.89,2.82) | 0.1389        | <b>0.17(0.05,0.58)</b> | <b>0.0047</b> |
| Subway                       | 0.92(0.45,1.88)        | 0.4887 | 1.21(0.68,2.13) | 0.6735        | 1.02(0.29,3.53)        | 0.7110        |
| O <sub>3</sub> <sup>a</sup>  |                        |        |                 |               |                        |               |
| Car or Taxi                  | Reference              | -      | Reference       | -             | Reference              | -             |
| Walking                      | <b>0.44(0.21,0.91)</b> | 0.5779 | 0.71(0.41,1.23) | 0.3244        | 0.98(0.43,2.23)        | 0.9830        |
| Cycling                      | 0.78(0.41,1.49)        | 0.9737 | 1.30(0.73,2.32) | 0.1207        | 1.92(0.77,4.81)        | 0.2789        |



|        |                 |        |                 |        |                 |        |
|--------|-----------------|--------|-----------------|--------|-----------------|--------|
| Bus    | 0.72(0.43,1.21) | 0.8488 | 0.79(0.48,1.27) | 0.4161 | 1.29(0.53,3.12) | 0.1422 |
| Subway | 0.77(0.45,1.32) | 0.8521 | 1.31(0.82,2.11) | 0.1950 | 0.60(0.23,1.57) | 0.2805 |

Abbreviations: CI, confidence interval; OR, odds ratio; PM<sub>10</sub>, particulate matter ≤ 10 μm in aerodynamic diameter; PM<sub>2.5</sub>, particulate matter ≤ 2.5 μm in aerodynamic diameter; SO<sub>2</sub>: sulphur dioxide; CO, carbon monoxide; NO<sub>2</sub>, nitrogen dioxide; O<sub>3</sub>, ozone.

<sup>Δ</sup> Data were shown in OR (95% CI). OR were scaled to the interquartile range (IQR) for each air pollutant. Bold indicates significant values.

<sup>a</sup> adjusted for age, gender, education, commuting time per day, self-reported work stress, physical activity intensity, sleep duration, smoking status, alcohol consumption status, proportion of meat and vegetable intake, dietary preferences and medical history of hypertension and diabetes, PM<sub>10</sub>.

<sup>b</sup> adjusted for age, gender, education, commuting time per day, self-reported work stress, physical activity intensity, sleep duration, smoking status, alcohol consumption status, proportion of meat and vegetable intake, dietary preferences and medical history of hypertension and diabetes, PM<sub>2.5</sub>.

<sup>c</sup> adjusted for age, gender, education, commuting time per day, self-reported work stress, physical activity intensity, sleep duration, smoking status, alcohol consumption status, proportion of meat and vegetable intake, dietary preferences and medical history of hypertension and diabetes, SO<sub>2</sub>.

<sup>d</sup> adjusted for age, gender, education, commuting time per day, self-reported work stress, physical activity intensity, sleep duration, smoking status, alcohol consumption status, proportion of meat and vegetable intake, dietary preferences and medical history of hypertension and diabetes, CO.

<sup>e</sup> adjusted for age, gender, education, commuting time per day, self-reported work stress, physical activity intensity, sleep duration, smoking status, alcohol consumption status, proportion of meat and vegetable intake, dietary preferences and medical history of hypertension and diabetes, NO<sub>2</sub>.

<sup>f</sup> adjusted for age, gender, education, commuting time per day, self-reported work stress, physical activity intensity, sleep duration, smoking status, alcohol consumption status, proportion of meat and vegetable intake, dietary preferences and medical history of hypertension and diabetes, O<sub>3</sub>.

Table S7. Results of logistic regression models for the association between commuting mode and **overall obesity** in subgroups of physical activity intensity. <sup>Δ</sup>

| Main commuting mode           | Mild (n=5307)         |                                 | Moderate (n=4541)     |                                 | Vigorous (n=676) |                                 |
|-------------------------------|-----------------------|---------------------------------|-----------------------|---------------------------------|------------------|---------------------------------|
|                               | OR (95% CI)           | <i>P</i> <sub>interaction</sub> | OR (95% CI)           | <i>P</i> <sub>interaction</sub> | OR (95% CI)      | <i>P</i> <sub>interaction</sub> |
| PM <sub>10</sub> <sup>a</sup> |                       |                                 |                       |                                 |                  |                                 |
| Car or Taxi                   | Reference             | -                               | Reference             | -                               | Reference        | -                               |
| Walking                       | <b>0.43(0.2,0.93)</b> | 0.0691                          | 0.78(0.39,1.57)       | 0.7333                          | 2.31(0.34,15.44) | 0.1622                          |
| Cycling                       | 0.73(0.32,1.63)       | 0.8713                          | <b>0.36(0.16,0.8)</b> | <b>0.0107</b>                   | 0.19(0.02,2.1)   | 0.1305                          |

|                                |                 |        |                 |               |                        |               |
|--------------------------------|-----------------|--------|-----------------|---------------|------------------------|---------------|
| Bus                            | 0.65(0.37,1.17) | 0.3325 | 0.69(0.37,1.31) | 0.4655        | 0.84(0.11,6.68)        | 0.9152        |
| Subway                         | 0.76(0.42,1.35) | 0.8055 | 0.61(0.32,1.17) | 0.2281        | 0.66(0.1,4.47)         | 0.9067        |
| PM <sub>2.5</sub> <sup>a</sup> |                 |        |                 |               |                        |               |
| Car or Taxi                    | Reference       | -      | Reference       | -             | Reference              | -             |
| Walking                        | 0.7(0.32,1.52)  | 0.6328 | 0.72(0.34,1.52) | 0.9965        | 3.3(0.34,32.24)        | 0.1575        |
| Cycling                        | 0.48(0.2,1.16)  | 0.2416 | 0.8(0.35,1.83)  | 0.7027        | 0.63(0.05,8.39)        | 0.6734        |
| Bus                            | 1.32(0.73,2.4)  | 0.1088 | 1.19(0.61,2.29) | 0.2982        | 1.9(0.3,11.93)         | 0.4286        |
| Subway                         | 0.85(0.46,1.56) | 0.8593 | 1.14(0.59,2.2)  | 0.3891        | 0.16(0.02,1.31)        | 0.1185        |
| SO <sub>2</sub> <sup>a</sup>   |                 |        |                 |               |                        |               |
| Car or Taxi                    | Reference       | -      | Reference       | -             | Reference              | -             |
| Walking                        | 0.89(0.4,1.99)  | 0.8170 | 1.58(0.70,3.58) | <b>0.0416</b> | 3.22(0.21,48.42)       | 0.2336        |
| Cycling                        | 0.76(0.29,2.01) | 0.9773 | 1.03(0.44,2.40) | 0.7869        | 0.32(0.01,10.72)       | 0.5080        |
| Bus                            | 0.97(0.5,1.88)  | 0.6893 | 1.47(0.74,2.91) | 0.0963        | 1.39(0.10,18.86)       | 0.7696        |
| Subway                         | 0.83(0.42,1.64) | 0.9071 | 0.65(0.32,1.34) | 0.3799        | 0.89(0.07,10.55)       | 0.8862        |
| CO <sup>a</sup>                |                 |        |                 |               |                        |               |
| Car or Taxi                    | Reference       | -      | Reference       | -             | Reference              | -             |
| Walking                        | 0.64(0.29,1.43) | 0.5262 | 1.22(0.60,2.48) | 0.0984        | 1.17(0.21,6.48)        | 0.4054        |
| Cycling                        | 0.70(0.28,1.71) | 0.7983 | 0.89(0.41,1.94) | 0.9156        | <b>0.03(0.00,0.81)</b> | <b>0.0211</b> |
| Bus                            | 1.08(0.55,2.11) | 0.4667 | 1.41(0.75,2.65) | 0.0973        | 0.34(0.04,3.18)        | 0.3272        |
| Subway                         | 0.98(0.51,1.88) | 0.5185 | 1.19(0.64,2.22) | 0.3013        | 0.25(0.04,1.76)        | 0.2375        |
| NO <sub>2</sub> <sup>a</sup>   |                 |        |                 |               |                        |               |
| Car or Taxi                    | Reference       | -      | Reference       | -             | Reference              | -             |
| Walking                        | 1.21(0.49,3.00) | 0.4859 | 0.88(0.33,2.32) | 0.9728        | 1.50(0.11,20.01)       | 0.7024        |
| Cycling                        | 0.85(0.30,2.39) | 0.5924 | 1.20(0.46,3.11) | 0.7393        | 1.30(0.05,37.15)       | 0.8739        |
| Bus                            | 1.18(0.55,2.51) | 0.5045 | 1.32(0.60,2.89) | 0.5458        | 0.24(0.02,2.88)        | 0.0972        |
| Subway                         | 0.93(0.42,2.04) | 0.8379 | 1.86(0.83,4.14) | 0.0638        | <b>0.04(0.00,0.80)</b> | <b>0.0294</b> |

| O <sub>3</sub> <sup>a</sup> | Reference       | -      | Reference              | -             | Reference       | -      |
|-----------------------------|-----------------|--------|------------------------|---------------|-----------------|--------|
| Car or Taxi                 |                 |        |                        |               |                 |        |
| Walking                     | 0.72(0.34,1.53) | 0.7673 | 0.49(0.23,1.05)        | 0.3223        | 0.26(0.04,1.66) | 0.2362 |
| Cycling                     | 1.21(0.62,2.36) | 0.1675 | 0.70(0.33,1.46)        | 0.4161        | 1.23(0.21,7.21) | 0.8225 |
| Bus                         | 0.92(0.53,1.63) | 0.7420 | <b>0.39(0.20,0.77)</b> | <b>0.0129</b> | 0.70(0.13,3.91) | 0.6894 |
| Subway                      | 0.97(0.53,1.78) | 0.4673 | <b>0.48(0.24,0.93)</b> | 0.0506        | 0.81(0.14,4.54) | 0.9049 |

Abbreviations: CI, confidence interval; OR, odds ratio; PM<sub>10</sub>, particulate matter ≤ 10 µm in aerodynamic diameter; PM<sub>2.5</sub>, particulate matter ≤ 2.5 µm in aerodynamic diameter; SO<sub>2</sub>: sulphur dioxide; CO, carbon monoxide; NO<sub>2</sub>, nitrogen dioxide; O<sub>3</sub>, ozone.

<sup>Δ</sup> Data were shown in OR (95% CI). OR were scaled to the interquartile range (IQR) for each air pollutant. Bold indicates significant values.

<sup>a</sup> adjusted for age, gender, education, commuting time per day, self-reported work stress, physical activity frequency, sleep duration, smoking status, alcohol consumption status, proportion of meat and vegetable intake, dietary preferences and medical history of hypertension and diabetes, PM<sub>10</sub>.

<sup>b</sup> adjusted for age, gender, education, commuting time per day, self-reported work stress, physical activity frequency, sleep duration, smoking status, alcohol consumption status, proportion of meat and vegetable intake, dietary preferences and medical history of hypertension and diabetes, PM<sub>2.5</sub>.

<sup>c</sup> adjusted for age, gender, education, commuting time per day, self-reported work stress, physical activity frequency, sleep duration, smoking status, alcohol consumption status, proportion of meat and vegetable intake, dietary preferences and medical history of hypertension and diabetes, SO<sub>2</sub>.

<sup>d</sup> adjusted for age, gender, education, commuting time per day, self-reported work stress, physical activity frequency, sleep duration, smoking status, alcohol consumption status, proportion of meat and vegetable intake, dietary preferences and medical history of hypertension and diabetes, CO.

<sup>e</sup> adjusted for age, gender, education, commuting time per day, self-reported work stress, physical activity frequency, sleep duration, smoking status, alcohol consumption status, proportion of meat and vegetable intake, dietary preferences and medical history of hypertension and diabetes, NO<sub>2</sub>.

<sup>f</sup> adjusted for age, gender, education, commuting time per day, self-reported work stress, physical activity frequency, sleep duration, smoking status, alcohol consumption status, proportion of meat and vegetable intake, dietary preferences and medical history of hypertension and diabetes, O<sub>3</sub>.

Table S8. Results of logistic regression models for the association between commuting mode and **abdominal obesity** in subgroups of physical activity intensity. <sup>Δ</sup>

| Main commuting mode            | Mild (n=5307)          |                                 | Moderate (n=4541) |                                 | Vigorous (n=676) |                                 |
|--------------------------------|------------------------|---------------------------------|-------------------|---------------------------------|------------------|---------------------------------|
|                                | OR (95% CI)            | <i>P</i> <sub>interaction</sub> | OR (95% CI)       | <i>P</i> <sub>interaction</sub> | OR (95% CI)      | <i>P</i> <sub>interaction</sub> |
| PM <sub>10</sub> <sup>a</sup>  |                        |                                 |                   |                                 |                  |                                 |
| Car or Taxi                    | Reference              | -                               | Reference         | -                               | Reference        | -                               |
| Walking                        | <b>0.29(0.16,0.53)</b> | <b>0.001</b>                    | 0.86(0.50,1.47)   | 0.8401                          | 1.49(0.43,5.19)  | 0.1378                          |
| Cycling                        | <b>0.46(0.24,0.88)</b> | <b>0.0352</b>                   | 0.84(0.46,1.54)   | 0.7779                          | 0.26(0.05,1.49)  | 0.1521                          |
| Bus                            | <b>0.54(0.34,0.86)</b> | 0.1708                          | 1.00(0.61,1.64)   | 0.9436                          | 0.92(0.19,4.47)  | 0.3255                          |
| Subway                         | <b>0.43(0.27,0.69)</b> | <b>0.0026</b>                   | 0.93(0.57,1.51)   | 0.8273                          | 0.82(0.22,3.13)  | 0.9947                          |
| PM <sub>2.5</sub> <sup>a</sup> |                        |                                 |                   |                                 |                  |                                 |
| Car or Taxi                    | Reference              | -                               | Reference         | -                               | Reference        | -                               |
| Walking                        | 0.70(0.39,1.27)        | 0.7837                          | 1.38(0.81,2.38)   | 0.0889                          | 1.17(0.24,5.76)  | 0.4535                          |
| Cycling                        | 0.82(0.43,1.57)        | 0.8325                          | 0.83(0.44,1.54)   | 0.7604                          | 1.05(0.20,5.63)  | 0.8969                          |
| Bus                            | 0.74(0.47,1.18)        | 0.9608                          | 1.14(0.69,1.89)   | 0.5092                          | 0.64(0.16,2.62)  | 0.6579                          |
| Subway                         | 1.07(0.68,1.68)        | 0.2438                          | 1.00(0.61,1.63)   | 0.8962                          | 0.29(0.07,1.18)  | 0.1051                          |
| SO <sub>2</sub> <sup>a</sup>   |                        |                                 |                   |                                 |                  |                                 |
| Car or Taxi                    | Reference              | -                               | Reference         | -                               | Reference        | -                               |
| Walking                        | <b>0.45(0.23,0.88)</b> | 0.1171                          | 1.23(0.66,2.28)   | 0.2760                          | 2.15(0.27,17.13) | 0.2466                          |
| Cycling                        | 0.75(0.34,1.63)        | 0.6699                          | 1.10(0.57,2.10)   | 0.5334                          | 2.52(0.31,20.25) | 0.3495                          |
| Bus                            | 0.65(0.38,1.12)        | 0.6504                          | 1.52(0.90,2.58)   | 0.0765                          | 0.97(0.15,6.30)  | 0.4299                          |
| Subway                         | 0.62(0.36,1.06)        | 0.2594                          | 1.46(0.86,2.47)   | 0.1054                          | 0.50(0.10,2.58)  | 0.5047                          |
| CO <sup>a</sup>                |                        |                                 |                   |                                 |                  |                                 |
| Car or Taxi                    | Reference              | -                               | Reference         | -                               | Reference        | -                               |
| Walking                        | <b>0.49(0.26,0.93)</b> | 0.1865                          | 1.55(0.92,2.64)   | <b>0.0243</b>                   | 0.67(0.19,2.43)  | 0.9711                          |

|                              |                        |               |                 |        |                        |        |
|------------------------------|------------------------|---------------|-----------------|--------|------------------------|--------|
| Cycling                      | <b>0.44(0.22,0.90)</b> | <b>0.0444</b> | 0.97(0.54,1.76) | 0.7902 | 0.66(0.11,3.81)        | 0.6669 |
| Bus                          | 0.57(0.33,1.00)        | 0.3705        | 1.35(0.83,2.20) | 0.1568 | 0.9(0.20,4.06)         | 0.3687 |
| Subway                       | 0.71(0.42,1.19)        | 0.5218        | 1.05(0.66,1.68) | 0.7317 | 0.43(0.11,1.67)        | 0.2880 |
| NO <sub>2</sub> <sup>a</sup> |                        |               |                 |        |                        |        |
| Car or Taxi                  | Reference              | -             | Reference       | -      | Reference              | -      |
| Walking                      | 0.59(0.27,1.27)        | 0.6584        | 1.81(0.89,3.67) | 0.0773 | 0.67(0.11,4.11)        | 0.9317 |
| Cycling                      | 0.72(0.31,1.68)        | 0.5662        | 1.15(0.55,2.40) | 0.5142 | 2.44(0.22,27.63)       | 0.3822 |
| Bus                          | <b>0.47(0.25,0.89)</b> | 0.0927        | 1.63(0.89,2.98) | 0.1472 | 0.64(0.11,3.75)        | 0.8334 |
| Subway                       | 1.07(0.57,2.01)        | 0.4243        | 1.27(0.70,2.31) | 0.5548 | <b>0.17(0.03,0.98)</b> | 0.0739 |
| O <sub>3</sub> <sup>a</sup>  |                        |               |                 |        |                        |        |
| Car or Taxi                  | Reference              | -             | Reference       | -      | Reference              | -      |
| Walking                      | 0.77(0.43,1.36)        | 0.8658        | 0.63(0.36,1.11) | 0.1849 | 0.55(0.16,1.95)        | 0.7902 |
| Cycling                      | 1.28(0.73,2.24)        | 0.1308        | 1.10(0.61,2.00) | 0.4846 | 0.62(0.15,2.58)        | 0.5056 |
| Bus                          | 1.06(0.68,1.67)        | 0.0781        | 0.65(0.39,1.09) | 0.0929 | 0.49(0.12,2.03)        | 0.9535 |
| Subway                       | 1.01(0.63,1.61)        | 0.3729        | 0.97(0.58,1.61) | 0.9769 | 1.22(0.36,4.21)        | 0.5281 |

Abbreviations: CI, confidence interval; OR, odds ratio; PM<sub>10</sub>, particulate matter ≤ 10 µm in aerodynamic diameter; PM<sub>2.5</sub>, particulate matter ≤ 2.5 µm in aerodynamic diameter; SO<sub>2</sub>: sulphur dioxide; CO, carbon monoxide; NO<sub>2</sub>, nitrogen dioxide; O<sub>3</sub>, ozone.

<sup>Δ</sup> Data were shown in OR (95% CI). OR were scaled to the interquartile range (IQR) for each air pollutant. Bold indicates significant values.

<sup>a</sup> adjusted for age, gender, education, commuting time per day, self-reported work stress, physical activity frequency, sleep duration, smoking status, alcohol consumption status, proportion of meat and vegetable intake, dietary preferences and medical history of hypertension and diabetes, PM<sub>10</sub>.

<sup>b</sup> adjusted for age, gender, education, commuting time per day, self-reported work stress, physical activity frequency, sleep duration, smoking status, alcohol consumption status, proportion of meat and vegetable intake, dietary preferences and medical history of hypertension and diabetes, PM<sub>2.5</sub>.

<sup>c</sup> adjusted for age, gender, education, commuting time per day, self-reported work stress, physical activity frequency, sleep duration, smoking status, alcohol consumption status, proportion of meat and vegetable intake, dietary preferences and medical history of hypertension and diabetes, SO<sub>2</sub>.

<sup>d</sup> adjusted for age, gender, education, commuting time per day, self-reported work stress, physical activity frequency, sleep duration, smoking status, alcohol consumption status, proportion of meat and vegetable intake, dietary preferences and medical history of hypertension and diabetes, CO.

<sup>e</sup> adjusted for age, gender, education, commuting time per day, self-reported work stress, physical activity frequency, sleep duration, smoking status, alcohol

consumption status, proportion of meat and vegetable intake, dietary preferences and medical history of hypertension and diabetes, NO<sub>2</sub>.

<sup>f</sup> adjusted for age, gender, education, commuting time per day, self-reported work stress, physical activity frequency, sleep duration, smoking status, alcohol consumption status, proportion of meat and vegetable intake, dietary preferences and medical history of hypertension and diabetes, O<sub>3</sub>.
